# Supplementary material for: Prostaglandin F2α agonists induced enhancement in collagen1 expression is involved in the pathogenesis of the deepening of upper eyelid sulcus
Source: PubMed Central journal article supplement (PMC8076191; doi:10.1038/s41598-021-88562-4), 2021-04-26
Supplement: 41598_2021_88562_MOESM1_ESM.pdf [file 41598_2021_88562_MOESM1_ESM.pdf]

**Prostaglandin F2 $\alpha$  agonists induced enhancement in collagen1 expression is involved in the pathogenesis of the deepening of upper eyelid sulcus**

**Key words:** deepening of the upper eyelid sulcus (DUES), prostaglandin (PG) analogues, 3-dimension (3D) tissue culture

**Kaku Itoh, Yosuke Ida, Hiroshi Ohguro, Fumihito Hikage.**

Departments of Ophthalmology, Sapporo Medical University School of Medicine

All correspondence should be addressed to Fumihito Hikage

Tel# 81-11-611-2111, Fax# 81-11-613-6575, e-mail: [fuhika@gmail.com](mailto:fuhika@gmail.com)

Both authors (K. I and Y. I.) contributed equally to this study.

|              |         | Sequence                                              | Exon Location | RefSeqNumber |
|--------------|---------|-------------------------------------------------------|---------------|--------------|
| human RPLP0  | Probe   | 5'-/56-FAM/CCCTGTCTT/ZEN/CCCTGGGCATCAC/3IABkFQ/-3'    | 2-3           | NM_001002    |
|              | Forward | 5'-TCGTCTTTAAACCCTGCGTG-3'                            |               |              |
|              | Reverse | 5'-TGCTGCTCCCACAATGAAAC-3'                            |               |              |
| human PPARγ  | Probe   | 5'-/56-FAM/CTCATAATG/ZEN/CCATCAGGTTTGGGCG/3IABkFQ/-3' | 7-8           | NM_138712    |
|              | Forward | 5'-GTTTCAGAAATGCCTTGCACT-3'                           |               |              |
|              | Reverse | 5'-GGATTCAGCTGGTTCGATATCAC-3'                         |               |              |
| human FABP4  | Probe   | 5'-/56-FAM/CAGGAAAGT/ZEN/GGCATGGC/3IABkFQ/-3'         | 1-2           | NM_001442    |
|              | Forward | 5'-ACTTGTCTCCAGTAAAACTTTG-3'                          |               |              |
|              | Reverse | 5'-ATCACATCCCCATTCACT-3'                              |               |              |
| human ADIPOQ | Forward | 5'-AGCATCCTGAGCCCTGAT-3'                              | 1-3           | NM_00177800  |
|              | Reverse | 5'-CCTCACTTCCATTCTGACTGC-3'                           |               |              |
| human LEPTIN | Forward | 5'-AGAGTGGCTTAGAGGAGTCAAG-3'                          | 3-3           | NM_000230    |
|              | Reverse | 5'-TGGCTTCCAGGTATCTCCA-3'                             |               |              |
| human COL1A1 | Probe   | 5'-/56-FAM/TCGAGGGCC/ZEN/AAGACGAAGACATC/3IABkFQ/-3'   | 1-2           | NM_000088    |
|              | Forward | 5'-GACATGTTTCAAGTCTTGTGGAC-3'                         |               |              |
|              | Reverse | 5'-TTCTGTACGCAGGTGATTGG-3'                            |               |              |
| human COL4A1 | Probe   | 5'-/56-FAM/TCATACAGA/ZEN/CTTGGCAGCGGCT/3IABkFQ/-3'    | 51-52         | NM_001845    |
|              | Forward | 5'-AGAGAGGAGCGAGATGTTCA-3'                            |               |              |
|              | Reverse | 5'-TGAGTCAGGCTTCATTATGTTCT-3'                         |               |              |
| human COL6A1 | Forward | 5'-CCTCGTGGACAAAGTCAAGT-3'                            | 2-3           | NM_001848    |
|              | Reverse | 5'-GTGAGGCCCTGGATGATCTC-3'                            |               |              |
| human FN1    | Forward | 5'-CGTCCTAAAGACTCCATGATCTG-3'                         | 3-4           | NM_212482    |
|              | Reverse | 5'-ACCAATCTTGTAGGACTGACC-3'                           |               |              |
| human TIMP1  | Probe   | 5'-/56-FAM/TCAACCAGA/ZEN/CCACCTTATACCAGCG/3IABkFQ/-3' | 2-4           | NM_003254    |
|              | Forward | 5'-CCTTCTGCAATTCCGACCT-3'                             |               |              |
|              | Reverse | 5'-GCTTGAACCCCTTATACATCTTG-3'                         |               |              |
| human TIMP2  | Probe   | 5'-/56-FAM/TCTCATTGC/ZEN/AGGAAAGGCCGAGG/3IABkFQ/-3'   | 3-4           | NM_003255    |
|              | Forward | 5'-GACGTTGGAGGAAAGAAGGA-3'                            |               |              |
|              | Reverse | 5'-TGTGGTTTCAGGCTCTTCTTC-3'                           |               |              |
| human TIMP3  | Probe   | 5'-/56-FAM/CCTCCTTTA/ZEN/CCAGCTTCTCCCCAC/3IABkFQ/-3'  | 1-3           | NM_000362    |
|              | Forward | 5'-CCTTCTGCAACTCCGACATC-3'                            |               |              |
|              | Reverse | 5'-CGGTACATCTTCACTGCTTGA-3'                           |               |              |
| human TIMP4  | Probe   | 5'-/56-FAM/ACTGAGGAC/ZEN/CTGACCAGTCAAGAGA/3IABkFQ/-3' | 3-4           | NM_003256    |
|              | Forward | 5'-GGTTTGAGAAAGTCAAGGATGTTT-3'                        |               |              |
|              | Reverse | 5'-GTTGCACAGATGGATGAAGAC-3'                           |               |              |
| human LOX    | Forward | 5'-ACATTCGCTACACAGGACATC-3'                           | 6-7           | NM_002317    |
|              | Reverse | 5'-TTCCCACTTCAGAACACCAG-3'                            |               |              |
| human EPAS1  | Forward | 5'-AGCCTATGAATTCTACCATGCG-3'                          | 7-8           | NM_001430    |
|              | Reverse | 5'-CTTTGCGAGCATCCGGTA-3'                              |               |              |

**Supplemental Table 1.** DNA sequences of primers and TaqMan probes are shown.
